# The dimensions of species diversity

Matthew J. Larcombe<sup>1</sup>, Gregory J. Jordan<sup>2</sup>, David Bryant<sup>3</sup>, and Steven I. Higgins<sup>1,4</sup>

<sup>1</sup>Department of Botany, University of Otago, PO Box 56, Dunedin 9054, New Zealand

<sup>2</sup>School of Biological Sciences, University of Tasmania, Private Bag 55, Hobart, Tasmania 7001, Australia

<sup>3</sup>Department of Maths and Statistics, University of Otago, PO Box 56, Dunedin 9054, New Zealand

<sup>4</sup>Plant Ecology, University of Bayreuth, Universitätsstraße 30, 95447 Bayreuth, Germany

## ABSTRACT

1 Diversification processes underpin the patterns of species diversity that fascinate biologists.  
2 Two competing hypotheses disagree about the effect of competition on these processes.  
3 The bounded hypothesis suggests that species diversity is limited (bounded) by competition  
4 between species for finite niche space, while the unbounded hypothesis proposes that evolution  
5 and ecological opportunity associated with speciation, render competition unimportant. We  
6 use phylogenetically structured niche modelling, to show that processes consistent with both  
7 these diversification models have driven species accumulation in conifers. In agreement with  
8 the bounded hypothesis, niche competition constrained diversification, and in line with the  
9 unbounded hypothesis, niche evolution and partitioning promoted diversification. We then  
10 analyse niche traits to show that these diversification enhancing and inhibiting processes  
11 can occur simultaneously on different niche dimensions. Together these results suggests a  
12 new hypothesis for lineage diversification based on the multi-dimensional nature of ecological  
13 niches that accommodates both bounded and unbounded diversification processes.

14 Species diversity has changed dramatically over geological time<sup>1</sup>. Although diversity has  
15 clearly increased since life began, reconstructions using the fossil record are ambiguous about  
16 the causes of, and constraints on, this increase<sup>2-4</sup>. One important open question is whether  
17 the rate of species accumulation slows as diversity increases, or is independent of diversity<sup>4-6</sup>.  
18 The latter *unbounded hypothesis* implies that time, and the rate of evolution within clades  
19 (monophyletic branches of phylogenies) control diversification and that there is essentially  
20 no limit on total diversity<sup>3</sup>. Alternatively, the former *bounded hypothesis* suggests that  
21 competitive ecological processes result in a diversity-dependent ceiling on species richness<sup>7</sup>.  
22 Resolving this debate is essential for understanding limits to biodiversity, and why diversity  
23 is unevenly distributed in space and time and between clades.

24 Previous attempts to discriminate between bounded and unbounded diversification have  
25 focused on modelling species accumulation inferred from phylogenies<sup>8,9</sup> and fossil assem-  
26 blages<sup>5,6,10</sup>, and to a lesser extent testing how ecological niche evolution impacts diversi-  
27 fication<sup>11,12</sup>. The results to date have been inconclusive and often contradictory<sup>2-4,13,14</sup>,  
28 suggesting that a more nuanced explanation may be required<sup>4,14</sup>. Here we quantify the  
29 extent to which both bounded and unbounded processes influence species accumulation in

30 the conifers. Our analysis exploits methodological advances that allow us to infer multi-  
31 dimensional physiological-niche properties for large suites of species<sup>15,16</sup>. We use this data  
32 to discriminate between the distinctive niche-characteristics predicted by the bounded and  
33 unbounded hypotheses. Specifically we test support for the bounded hypothesis' prediction  
34 that diversification should slow as niche overlap increases within clades<sup>2,17</sup> and the unbounded  
35 hypothesis' prediction that niche evolution accommodates increasing diversity by allowing  
36 the partitioning or expansion of niche space<sup>3,18,19</sup>.

37 Conifers are an ecologically important, globally distributed division of plants (Fig. 1)  
38 that are ideal for this analyses. This large, well-studied lineage has well-defined clades,  
39 excellent distribution data<sup>20</sup>, and is ancient enough ( $> 300$  myo;<sup>21</sup>) to assess how species  
40 accumulate through time. We use distribution data and a process-based species distribution  
41 model (SDM) to infer physiological niche parameters for each of 455 conifer species (75  
42 % of extant conifers). The niche parameters are combined with a robust fossil calibrated  
43 phylogeny<sup>21</sup>, and interpreted statistically using an *a-priori* conceptual model of how niche  
44 and phylogenetic parameters relate to species richness (Fig. 2). The model postulates that  
45 species richness can be impacted both directly and/or indirectly by clade age (CA), the  
46 multivariate niche evolution rate (NER), as well as two novel metrics: clade niche size (CNS)  
47 and phylogenetic competition index (PCI). Clade niche size is the projected potential niche  
48 size (number of grid cells occupied by all species in the clade) corrected for clade species  
49 number (see Methods). The phylogenetic competition index is the product of niche overlap  
50 and geographic overlap between species within clades. The parameters of this model are  
51 estimated using phylogenetically constrained Bayesian path analysis. We conduct the analysis  
52 at two phylogenetic levels, using 10 large clades and 42 smaller clades.

## 53 Results

54 We found that diversification in conifers was influenced in almost equal measure by bounded  
55 and unbounded processes (Fig. 3a). In line with the bounded hypothesis, competition  
56 with relatives (PCI) had a strong negative effect on species richness, which suggests that  
57 available niche space can limit species accumulation. This effect was strong in both the 10  
58 (-1.02) and 42 (-0.88) clade analyses. Support for the unbounded hypothesis was evidenced  
59 by our finding that niche evolution rate (NER) contributed positively to species richness,  
60 suggesting that higher niche evolution rates within clades allow more species to accumulate.  
61 This effect was stronger in the 42 clade analysis (0.56) than in the 10 clade analysis (0.31).  
62 Furthermore we found that CNS had neutral or negative influence on SR, suggesting that  
63 niche partitioning constitutes the main mode of niche evolution in conifers. The negative  
64 effect of clade niche size in the 10 clade analysis is somewhat counter-intuitive since it suggests  
65 that clades with smaller niche volumes accommodate more species. However, this pattern  
66 is consistent with niche partitioning accompanied by allee effects and/or competition<sup>17,22</sup>  
67 driving random extinction processes that lead to a reduction in clade-niche-size as postulated  
68 in Fig. 3b. In fact the significant direct effect of competition (PCI, -0.37) and relatively  
69 strong effect of clade age (CA, -0.26) on clade nice size (Fig. 3a), are consistent with such  
70 competition driven extinction processes unfolding through time<sup>17</sup>. The absence of this effect

71 in the 42 clade analysis probably reflects the much younger average clade age (17my compared  
72 112my), and smaller clade sizes, which mean that partitioning/extinction processes (Fig. 3b)  
73 will be less frequent and therefore more difficult to detect. This is also in line with previous  
74 work<sup>23</sup> suggesting extinction played a pivotal role in the diversification of older conifer clades.

75 Although most previous work has favoured either bounded<sup>2,8,12,24</sup> or unbounded<sup>3,25,26</sup>  
76 processes driving diversification, our results are consistent with previous observational<sup>10,18</sup>,  
77 theoretical<sup>14</sup> and modelling<sup>4,10</sup> work, which suggests that both bounded and unbounded  
78 processes influence diversification. For example, much of the empirical evidence is consistent  
79 with diversification slowing, rather than reaching an asymptote<sup>14,18</sup>. This led to the "damped  
80 increase" hypothesis, which in line with our results, suggests that competition induced by  
81 niche filling reduces diversification rate, while specialisation or new ecological opportunities  
82 counteract this effect<sup>14</sup>. Others have extended these ideas to show that the incongruity  
83 between strict bounded and unbounded views could be overcome by allowing diversity-  
84 accumulation-models to vary between periods of either bounded or unbounded diversification<sup>4</sup>.  
85 These studies do not however provide a population/species level mechanism that could drive  
86 shifts in diversification processes<sup>4</sup>.

87 To address this mechanistic basis, we examined whether niche dimensionality can drive  
88 variation in diversification processes<sup>4,27</sup>. To explore this possibility we examined evidence for  
89 conservatism in the evolution of the traits that define the physiological niche of species in our  
90 dataset (see Methods). We found substantial variation in the level of conservatism within and  
91 between traits (Supplementary Materials Table S1), suggesting that some niche dimensions  
92 may be more evolutionarily labile than others. Indeed, a comparison of trait disparity and  
93 trait evolution rates for each trait and clade combination (10 clade classification), showed high  
94 levels of variation in evolution rate between traits within clades (Fig. 3c). The deviations  
95 from the trend line in Figure 3c highlights this variation. For example in Clade 4, traits  
96 a and d (highlighted with solid circles) are more labile than predicted by the degree of trait  
97 disparity, whereas traits b and c (highlighted with dashed circles) are more conservative  
98 than expected. Such variation in evolutionary flexibility between traits within clades may  
99 accommodate the operation of both bounded and unbounded processes. This can be seen  
100 more clearly by focussing attention on single clades. For example, in Clade 7 (*Pinus*, Fig. 4),  
101 the effect of soil moisture on growth (panel f) is highly conserved in the sub-clades highlighted  
102 with solid ellipses, suggesting that interspecific competition is likely to be high along this  
103 niche dimension in these sub-clades. However, these same sub-clades are labile in terms of  
104 their temperature requirements for growth (traits b and c, highlighted with dashed ellipses in  
105 Fig. 4b and Fig. 4c), indicating that evolution and specialisation are possible along these  
106 niche dimensions (Fig. 4). Analogous patterns can be seen in the other *Pinus* sub-clades  
107 (Fig. 4) and the other clades (Supplementary Materials Fig. S1-S9).

108 Thus, by considering the multi-dimensional nature of niche evolution, we have shown how  
109 bounded and un-bounded diversification processes may simultaneously control diversification  
110 rates. Niche dimensionality has long been thought to promote diversity by partitioning  
111 resources and facilitating coexistence<sup>28</sup>, and there is considerable empirical support for  
112 this hypothesis<sup>27</sup>. Most previous assessments of how niche characteristics impact macro-

113 diversification have used low dimensional proxies of the niche such as body size<sup>12</sup> or climatic  
114 range<sup>11</sup>. In contrast, our assessment of multiple, physiological niche traits, reveals that both  
115 diversity-limiting competition, and diversity-promoting evolution may operate concurrently.  
116 At the population level these processes are likely to be separated in space and/or time - in line  
117 with models by McPeck<sup>29</sup> and Marshall and Quental<sup>4</sup> respectively. For example, populations  
118 along environmental gradients could experience variation in the opportunity for specialisation  
119 or niche expansion along some niche dimensions but experience competition along other  
120 niche dimensions<sup>29</sup>. Similarly, changes in the environment could induce temporal variation in  
121 selection pressure that affects the interplay between conservative and labile niche traits<sup>4</sup>.

122 In summary, we have identified how processes that define the niche geometry of conifer  
123 clades can jointly promote and constrain diversification. Our results confirm that the con-  
124 trasting processes that underpin bounded and unbounded diversification have both operated  
125 during the evolution of a major lineage. Our study thereby provides an analysis frame-  
126 work for a new multi-dimensional-niche hypothesis that unifies the bounded and unbounded  
127 hypotheses<sup>4,10,14,18</sup>. The study also highlights a potential anthropogenic obstruction to  
128 future diversification. Habitat loss and fragmentation threaten existing global biodiversity  
129 by (among other things) increasing extinction rates<sup>30</sup>. Our results suggest that habitat  
130 loss and fragmentation could also have a compounding negative effect on future diversity  
131 accumulation. Communities that are "crowded" into smaller areas of remnant habitat are  
132 likely to experience increased competition<sup>30</sup>, thereby increasing the likelihood that bounded  
133 processes will constrain diversification.

## 134 **Methods**

### 135 **Data acquisition and preparation**

136 Geo-referenced collection data for all conifer species were extracted from the Global Biodiver-  
137 sity Information Facility ([www.gbif.org](http://www.gbif.org)). These data were supplemented by published species  
138 records not in GBIF from:<sup>31-36</sup>. Climate estimates were made for each point record, using  
139 Worldclim (37). Data was cleaned manually by firstly eliminating duplicate records, then  
140 for consistency with species distribution descriptions<sup>31</sup>, and then by comparing Worldclim  
141 estimates of altitude, with the altitudes provided with each site record. Where Worldclim  
142 altitudes were inconsistent with the altitude in species descriptions by more than 300 m, we  
143 replaced these records with estimates from nearby sites with altitudes consistent with the  
144 descriptions.

### 145 **Estimating physiological niche traits**

146 We estimated the physiological niche traits of the study species using a physiologically-based  
147 approach to species distribution modelling<sup>15</sup>. This method uses the Thornley Transport  
148 Resistance (TTR) model of plant growth<sup>37</sup> to estimate the niche traits that match the  
149 observed distribution of species. The TTR model<sup>37</sup>, is an ordinary differential equation  
150 model that considers how plant growth is influenced by carbon uptake, nitrogen uptake, and  
151 the allocation of carbon and nitrogen between roots and shoots. It explicitly separates the  
152 physiological processes of resource uptake from biomass growth. The implementation by<sup>15</sup>

153 relates the uptake and growth processes to environmental forcing variables. Specifically, the  
154 model considers how carbon uptake might be limited by temperature, soil moisture, solar  
155 radiation, and shoot nitrogen; nitrogen uptake might be limited by temperature, soil moisture,  
156 and soil nitrogen; and growth and respiration loss might be influenced by temperature.  
157 The model runs on a monthly time step, which allows it to explicitly consider how seasonal  
158 fluctuations in the forcing variables interactively influence plant resource uptake and growth.<sup>15</sup>  
159 provides a full description of the model and its assumptions.

160 We use the cleaned presence dataset described above to identify locations where the  
161 species occur. A variety of methods for simulating absence points (often called pseudoabsence  
162 points) are available, but the method adopted is regarded as a relatively small source of  
163 error<sup>38</sup>. Our method balances the number of presence and absence points and stratifies by  
164 environment type the selection of absence points. To define environment types we use a  
165 partitioning algorithm *clara*<sup>39</sup> to classify the TTR input variables into 25 environmental  
166 zones. We further restricted the selection of absence points to the zoological realm(s) where  
167 the species occurs and to distances >0.25 km from the presence points.

168 The model predicts the potential biomass of an individual plant as a function of the  
169 environmental forcing variables at a site. Following the work of<sup>15</sup>, we assume that  $p_i$ , the  
170 probability of a species occurring at site  $i$ , is described by the complementary log-log of the  
171 modelled plant biomass at site  $i$  and that the likelihood of observing the presence absence data  
172 ( $y_i$ ) at site  $i$  is described by the Bernoulli distribution. To estimate the parameters, we used the  
173 differential evolution optimization algorithm<sup>40</sup> to find the set of parameters that maximizes  
174 this likelihood over all sites. The model fits were evaluated by examining the confusion matrix  
175 (a matrix comparing the number of true positives, true negative, false positives and false  
176 negatives), with particular weight given to the false negative rate, i.e. instances where the  
177 model predicts the species to be absent, but it is actually present (Supplementary Materials  
178 Table S2).

179 We restrict projection of potential species ranges to the subset of environmental zones (see  
180 above) present in each species' occurrence data; this prevents predictions beyond the data  
181 domain used for estimating the model parameters. We calculated the niche size of species  
182 in two ways: 1) projecting species ranges for the world, and 2) using a resampled dataset  
183 that assumes that the world's environmental zones are equally common. This second method  
184 corrects for any bias in projected range size introduced by variation in the extent of different  
185 environmental zones, but maintains the covariance structure of the environmental data<sup>41</sup>. To  
186 create a dataset where each environmental zone is equally common, we created a resampled  
187 dataset of the environmental data. We again use *clara* to classify the global TTR input  
188 data into 50 environmental zones. We then sampled a finite number (1,000 in our case) of  
189 locations from each of 50 environmental zones, which produces an environmental dataset  
190 where each environment zone is equally represented. We then project the range sizes of species  
191 in this resampled environmental space. Analyses conducted using geographic locations and  
192 resampled locations yielded very similar results. The analysis based on resampled locations is  
193 presented in the main manuscript while the analysis based on geographic locations is available  
194 in Supplementary Materials Fig. S10.

## 195 **Phylogenetic methods**

196 We used the fossil calibrated conifer phylogeny of Leslie et al.<sup>21</sup>, which is based on two  
197 chloroplast genes and two nuclear genes. We pruned this 487 species tree to match the 455  
198 species for which we had good distributional data. Although a clade is any monophyletic  
199 group in a phylogeny, the ability to detect effects in clade-wise analysis will be in part reliant  
200 on having enough variation in clade size<sup>42</sup>. Therefore we developed two clade classifications.  
201 The first inclusive division is based on tree topology at deeper well supported nodes, and  
202 it aimed to retain major taxonomic groups such as *Pinus*, resulting in 10 clades (supple-  
203 mentary Information 3). The second lower division is based on a time-slice approach at  
204 Eocene/Oligocene boundary (33.9ma) because using tree topology closer to the tips becomes  
205 more difficult. This second approach produced 68 clades, 28 of which included a single  
206 species. These single species were dropped from the analysis, leaving 42 clades and 429 species  
207 in the second analysis (Supplementary Materials Table S2). We recognize that removing  
208 single species clades might bias rate estimates because these are the clades with the lowest  
209 diversification. However, the dataset still covers a wide range of clade species richness (2 - 45  
210 species), and meaningful estimates for single species cannot be calculated for most subsequent  
211 metrics used in our analysis (e.g. niche evolution rate, clade niche overlap, clade geographic  
212 overlap etc.). Furthermore, this potential bias only affects the 42 clade analysis and the  
213 general agreement between the 10 and 42 clade analyses (see main text) suggests that any  
214 effect is inconsequential.

## 215 **Clade level data**

216 For each clade we calculate the following metrics: age, niche size corrected for species number,  
217 niche evolution rate, and phylogenetic competition index. The crown age of the clade was  
218 calculated directly from the tree using the branching time function in APE<sup>43,44</sup>. Because  
219 clades with more species could have larger clade niche sizes by chance, we used the mean of  
220 10,000 bootstrap resamples to obtain corrected estimates of the clade niche size relative to  
221 the smallest clade (12 and 2 for the 10 and 42 clade datasets respectively).

222 The calculation of niche evolution rate involves using a multi-variate model. The TTR  
223 species distribution model estimates 24 parameters associated with plant growth (see above).  
224 For this reason we first extracted the most informative of the 24 niche parameters for the  
225 analysis. Specifically we used phylogenetically corrected principal components analysis (PCA)  
226 to identify which model parameters had the most influence on shaping niche space in our  
227 dataset. PC 1 to 8 explained over 94 percent of the variation in the data set. The most  
228 influential parameters were identified based on the eigen vector loadings > 0.3, and vector  
229 plots were used to exclude correlated parameters. This procedure identified 11 parameters  
230 (Fig. 3 and 4) which were ranked in order of importance by summing the effect of each trait  
231 on each PC weighted by the proportion of the variance explained by that PC. For each clade  
232 these 11 parameters were fit together in a multivariate Brownian Motion (BM) of evolution in  
233 OUCH<sup>45</sup>. In the 42 clade analysis, clades with fewer than 12 species had insufficient degrees  
234 of freedom to fit the model, and parameters were dropped, (starting with the lowest ranked),  
235 until a model could be fitted. Following<sup>11</sup>, the trait evolution model was used to calculate  
236 the variance-covariance matrix for each clade. The diagonal elements of this matrix represent

237 the phylogenetic rate of character evolution which were summed to provide a multivariate  
238 rate parameter for each clade - the NER<sup>11</sup>.

239 The bounded hypothesis proposes that competition plays a key role in limiting diversi-  
240 fication. Competition is likely to be most intense between close relatives due to similar  
241 physiological requirements (or niches) wherever species co-occur<sup>17</sup>. To estimate competition,  
242 we produce a metric which summarises the degree of expected niche overlap and observed  
243 geographic overlap between species within clades. Geographic overlap between each species  
244 pair was estimated by producing a matrix of pairwise distance between all geo-referenced  
245 occurrence records. The average of this matrix was taken for each pair to produce a pairwise  
246 matrix of geographic distances between all species. This distance matrix was transformed to  
247 scale between 0 and 1, and the inverse was taken to provide an index of observed geographic  
248 similarity (overlap). Schoener's index<sup>46</sup> of niche overlap was estimated for each pair of species  
249 from the projected species distributions (i.e. the potential niche of the species) in SPAA<sup>47</sup>,  
250 and the subsequent matrix was also rescaled between 0 and 1. We then took the product  
251 of these overlap estimates to produce the phylogenetic competition index, thus the index  
252 has a potential range from 0 to 1, so that species pairs with high niche overlap and high  
253 geographic overlap have a high competition score, and those with low overlaps for one or  
254 both metrics have a low competition index. The mean was taken from clade level subsets  
255 of this matrix to produce the phylogenetic competition index for each clade. It should  
256 be noted that this index is a minimum estimate, because competition with more distantly  
257 related species is also possible<sup>24,48,49</sup> (p. 77). Incorporating community wide competition  
258 is theoretically possible using our approach (geographic overlap\*niche overlap), although it  
259 would be very data intensive and is outside the scope of this work. Additionally, despite  
260 the possible underestimate of competition, our model structure(see below) means that the  
261 calculation of un-associated dependencies (i.e. CA on SR; NER on SR; NER on CNS; CNS  
262 on SR, see Fig. 2) are not affected.

## 263 **Regression modelling**

264 We developed an a-priori conceptual model (Fig. 2) to estimate the relationships between  
265 SR, CNS, NER, CA and the PCI. The unbounded model predicts that specific evolutionary  
266 characteristics, controlled by phylogenetic niche conservatism, lead to clade specific diversi-  
267 fication rates. This has two consequences, 1) when the effect of diversification rate is factored  
268 out older clades will have more species than younger clades; and 2) positive diversification  
269 will involve niche evolution that manifests as either the expansion or partitioning of clade  
270 niche space as species accumulate. In line with these predictions our model allows: 1) CA  
271 to directly influence SR; and 2) NER to influence SR both directly, and indirectly, via its  
272 effect on CNS, with the direct relationship between CNS and SR indicating the mode of niche  
273 evolution (expansion or partitioning). Conversely, the bounded diversity model predicts that  
274 competition for limited resources places a limit on species number. It has long been recognised  
275 that competition is likely to be most intense between close relatives, because the ecological  
276 requirements of relatives are likely to be similar due to phylogenetic niche conservatism. Our  
277 estimate of PCI quantifies expected competition between species within clades. Therefore we  
278 allow PCI to directly effect SR, however, because PCI quantifies interactions between niches,

279 it is also allowed to indirectly influence SR via NER, and CNS.

280 We used Bayesian path analysis to calculate the effects in the path diagram (Fig. 2),  
281 while accounting for non-independence associated with phylogenetic relationships<sup>50</sup>. The  
282 total effect of each model parameter on the response variable (SR) was calculated from the  
283 direct and indirect effects following<sup>51</sup>. All model parameters were normalised and centred to  
284 a mean of zero and constant standard deviation. Following<sup>52</sup>, we use relative log-transformed  
285 species richness. For each analysis (10 and 42 clade), the full phylogenetic tree was collapsed  
286 to the clade level, and the inverse of the variance covariance matrix from this clade-tree was  
287 used to explicitly correct for the phylogenetic dependencies between clades. Modelling was  
288 undertaken using JAGS<sup>53</sup> running three chains for 15,000 iterations, after a burnin of 25,000,  
289 and thinning the chains to every fifth sample. Normal uniformed priors we used for the path  
290 effects and convergence was assessed using a range of diagnostics in coda<sup>54</sup>.

### 291 **Niche trait analysis**

292 We investigated the role of niche dimensionality in promoting both bounded and unbounded  
293 process, by using a trait like analysis to quantify the evolution of individual niche dimensions  
294 at the level of the full phylogeny and within clades. This analysis focused on the 11 niche  
295 dimensions identified above. Phylogenetic signal across the full phylogeny was estimated  
296 using Pagel's  $\lambda$ <sup>55</sup> with significance assessed using likelihood ratio tests in PHYTOOLS<sup>56</sup>.  
297 The PHYTOOLS function "contMap" was used to produce ancestral state reconstructions  
298 for each of the 11 most important niche traits. A second round of niche evolution modelling  
299 focused on estimating the evolution rate of the 11 primary niche dimensions independently  
300 for each clade in the 10 clade analysis. This was done as above except single variate BM  
301 models were fitted in OUCH rather than multi variate models. the subsequent trait evolution  
302 rate's for each clade were rescaled between zero and one to allow comparisons across clades.  
303 In order to produce a corresponding estimate of trait disparity (the magnitude of variation in  
304 actual trait values) average pairwise distance between species in each clade was calculated  
305 from raw trait data, and rescaled between 0 and 1. These two metrics were plotted in xy  
306 space to allow visualisation of clade level variation in evolutionary flexibility (Fig. 3c). We  
307 also made clade level ancestral reconstructions of the 11 main niche dimensions for the 10  
308 large clades to assess variation in the conservation of niche dimensions within clades (Fig. 4;  
309 Supplementary Material Fig. S1-S9).

### 310 **Data availability**

311 The data and computer code that support the findings of this study are available from the  
312 corresponding author upon request.

### 313 **Author contributions**

314 All authors were involved in developing the ideas. GJJ provided the distribution data  
315 and phylogeny. MJL and SIH undertook the analysis. MJL lead the writing. All authors  
316 contributed to the text. SIH and DB secured funding for the research.



## 317 **Acknowledgements**

318 We thank Bill Lee, Richard Gill, Esther Dale and members of the Eucalypt Genetics Research  
319 Group (University of Tasmania) for key discussion about the ideas. The work was funded by  
320 Te Aparangi Marsden Fund grant UOO1411.

## 321 **Author Information**

322 Reprints and permissions information is available at [www.nature.com/reprints](http://www.nature.com/reprints). The Authors  
323 declare no competing financial interests. Correspondence and requests for materials should be  
324 addressed to [matt.larcombe@otago.ac.nz](mailto:matt.larcombe@otago.ac.nz).

## **References**

1. Sepkoski, J. J. A kinetic model of phanerozoic taxonomic diversity. iii. post-paleozoic families and mass extinctions. *Paleobiology* **10**, 246–267 (1984).
2. Rabosky, D. L. & Hurlbert, A. H. Species richness at continental scales is dominated by ecological limits. *The Am. Nat.* **185**, 572–583 (2015).
3. Harmon, L. J. & Harrison, S. Species diversity is dynamic and unbounded at local and continental scales. *The Am. Nat.* **185**, 584–593 (2015).
4. Marshall, C. R. & Quental, T. B. The uncertain role of diversity dependence in species diversification and the need to incorporate time-varying carrying capacities. *Philos. Transactions Royal Soc. Lond. B: Biol. Sci.* **371**, DOI: 10.1098/rstb.2015.0217 (2016). DOI DOI: 10.1098/rstb.2015.0217.
5. Sepkoski, J. J. A kinetic model of phanerozoic taxonomic diversity ii. early phanerozoic families and multiple equilibria. *Paleobiology* 222–251 (1979).
6. Alroy, J. The shifting balance of diversity among major marine animal groups. *Sci.* **329**, 1191–1194 (2010).
7. Rabosky, D. L. Ecological limits and diversification rate: alternative paradigms to explain the variation in species richness among clades and regions. *Ecol. Lett.* **12**, 735–743 (2009).
8. Rabosky, D. L. & Lovette, I. J. Density-dependent diversification in north american wood warblers. *Proc. Royal Soc. Lond. B: Biol. Sci.* **275**, 2363–2371 (2008).
9. Derryberry, E. P. *et al.* Lineage diversification and morphological evolution in a large-scale continental radiation: the neotropical ovenbirds and woodcreepers (aves: Furnariidae). *Evol.* **65**, 2973–2986 (2011).
10. Ezard, T. H. G., Aze, T., Pearson, P. N. & Purvis, A. Interplay between changing climate and species' ecology drives macroevolutionary dynamics. *Sci.* **332**, 349–351 (2011).
11. Title, P. O. & Burns, K. J. Rates of climatic niche evolution are correlated with species richness in a large and ecologically diverse radiation of songbirds. *Ecol. Lett.* **18**, 433–440 (2015).
12. Price, T. D. *et al.* Niche filling slows the diversification of himalayan songbirds. *Nat.* **509**, 222–225 (2014).

13. Price, T. The debate on determinants of species richness. *The Am. Nat.* **185**, 571–571 (2015).
14. Cornell, H. V. Is regional species diversity bounded or unbounded? *Biol. Rev.* **88**, 140–165 (2013).
15. Higgins, S. I. *et al.* A physiological analogy of the niche for projecting the potential distribution of plants. *J. Biogeogr.* **39**, 2132–2145 (2012).
16. Evans, M. E., Merow, C., Record, S., McMahon, S. M. & Enquist, B. J. Towards process-based range modeling of many species. *Trends Ecol. & Evol.* **31**, 860 – 871 (2016).
17. Rabosky, D. L. Diversity-dependence, ecological speciation, and the role of competition in macroevolution. *Annu. Rev. Ecol. Evol. Syst.* **44**, 481–502 (2013).
18. Valentine, J. W. Niche diversity and niche size patterns in marine fossils. *J. Paleontol.* **43**, 905–915 (1969).
19. Wiens, J. J. The niche, biogeography and species interactions. *Philos. Transactions Royal Soc. Lond. B: Biol. Sci.* **366**, 2336–2350 (2011).
20. Farjon, A. & Filer, D. *An atlas of the world's conifers: an analysis of their distribution, biogeography, diversity and conservation status* (Brill, Leiden, 2013).
21. Leslie, A. B. *et al.* Hemisphere-scale differences in conifer evolutionary dynamics. *Proc. Natl. Acad. Sci.* **109**, 16217–16221 (2012).
22. Rosenblum, E. B. *et al.* Goldilocks meets santa rosalia: An ephemeral speciation model explains patterns of diversification across time scales. *Evol. Biol.* **39**, 255–261 (2012).
23. Crisp, M. D. & Cook, L. G. Cenozoic extinctions account for the low diversity of extant gymnosperms compared with angiosperms. *New Phytol.* **192**, 997–1009 (2011).
24. Silvestro, D., Antonelli, A., Salamin, N. & Quental, T. B. The role of clade competition in the diversification of north american canids. *Proc. Natl. Acad. Sci.* **112**, 8684–8689 (2015).
25. Belmaker, J. & Jetz, W. Relative roles of ecological and energetic constraints, diversification rates and region history on global species richness gradients. *Ecol. Lett.* **18**, 563–571 (2015).
26. Hedges, S. B., Marin, J., Suleski, M., Paymer, M. & Kumar, S. Tree of life reveals clock-like speciation and diversification. *Mol. Biol. Evol.* **32**, 835–845 (2015).
27. Harpole, W. S. *et al.* Addition of multiple limiting resources reduces grassland diversity. *Nat.* **537**, 93–96 (2016).
28. Hutchinson, G. E. Cold spring harbor symposium on quantitative biology. *Concluding remarks* **22**, 415–427 (1957).
29. McPeck, M. A. The ecological dynamics of clade diversification and community assembly. *The Am. Nat.* **172**, 270–284 (2008).

30. Fahrig, L. Effects of habitat fragmentation on biodiversity. *Annu. review ecology, evolution, systematics* **34**, 487–515 (2003).
31. Farjon, A. *A Handbook of the World's Conifers (2 vols.)*, vol. 1 (Brill, 2010).
32. Zhao, X. *et al.* Genetic variation and selection of introduced provenances of siberian pine (*pinus sibirica*) in frigid regions of the greater xing'an range, northeast china. *J. forestry research* **25**, 549–556 (2014).
33. Petrova, E., Goroshkevich, S., Belokon, M., Belokon, Y. S. & Politov, D. Distribution of the genetic diversity of the siberian stone pine, *pinus sibirica* du tour, along the latitudinal and longitudinal profiles. *Russ. J. Genet.* **50**, 467–482 (2014).
34. Timoshok, E., Timoshok, E. & Skorokhodov, S. Ecology of siberian stone pine (*pinus sibirica* du tour) and siberian larch (*larix sibirica* ledeb.) in the altai mountain glacial basins. *Russ. J. Ecol.* **45**, 194–200 (2014).
35. Larionova, A. Y., Ekart, A. K. & Kravchenko, A. N. Genetic diversity and population structure of siberian fir (*abies sibirica* ledeb.) in middle siberia, russia. *Eurasian J. For. Res. Univ. (Japan)* **10**, 185–192 (2007).
36. Hantemirova, E., Berkutenko, A. & Semerikov, V. Systematics and gene geography of *juniperus communis* l. inferred from isoenzyme data. *Russ. J. Genet.* **48**, 920–926 (2012).
37. Thornley, J. H. Modelling shoot : Root relations: the only way forward? *Annals Bot.* **81**, 165–171 (1998).
38. Barbet-Massin, M., Jiguet, F., Albert, C. H. & Thuiller, W. Selecting pseudo-absences for species distribution models: how, where and how many? *Methods Ecol. Evol.* **3**, 327–338 (2012).
39. Kaufman, L. & Rousseeuw, P. J. *Finding groups in data: an introduction to cluster analysis* (John Wiley & Sons, 2009).
40. Ardia, D., Boudt, K., Carl, P., Mullen, K. M. & Peterson, B. G. Differential evolution with deoptim. *The R J.* **3**, 27–34 (2011).
41. Higgins, S. I. & Richardson, D. M. Invasive plants have broader physiological niches. *Proc. Natl. Acad. Sci.* **111**, 10610–10614 (2014).
42. Wiens, J. J. The causes of species richness patterns across space, time, and clades and the role of “ecological limits”. *The Q. Rev. Biol.* **86**, 75–96 (2011).
43. Paradis, E., Claude, J. & Strimmer, K. Ape: analyses of phylogenetics and evolution in r language. *Bioinforma.* **20**, 289–290 (2004).
44. Paradis, E. *Analysis of Phylogenetics and Evolution with R* (Springer Science & Business Media, 2011).
45. Butler, M. A., King, A. A. & Crespi, B. J. Phylogenetic comparative analysis: a modeling approach for adaptive evolution. *The Am. Nat.* **164**, 683–695 (2004).
46. Schoener, T. W. Nonsynchronous spatial overlap of lizards in patchy habitats. *Ecol.* **51**, 408–418 (1970).

47. Gotelli, N. J. Null model analysis of species co-occurrence patterns. *Ecol.* **81**, 2606–2621 (2000).
48. Darwin, C. *On the origin of species by means of natural selection, or the Preservation of favoured races in the struggle for life* (John Murray, 1959).
49. Diamond, J. M. Niche shifts and the rediscovery of interspecific competition: Why did field biologists so long overlook the widespread evidence for interspecific competition that had already impressed darwin? *Am. Sci.* **66**, 322–331 (1978).
50. Gonzalez-Voyer, A. & von Hardenberg, A. *An Introduction to Phylogenetic Path Analysis* (Springer Berlin Heidelberg, Berlin, Heidelberg, 2014).
51. Schumacker, R. E. & Lomax, R. G. *A beginner's guide to structural equation modeling* (Psychology Press, 2004).
52. Rabosky, D. L., Slater, G. J. & Alfaro, M. E. Clade age and species richness are decoupled across the eukaryotic tree of life. *PLoS Biol* **10**, DOI.org/10.1371/journal.pbio.1001381 (2012).
53. Plummer, M. *et al.* Jags: A program for analysis of bayesian graphical models using gibbs sampling. In *Proceedings of the 3rd international workshop on distributed statistical computing*, vol. 124, 125 (Vienna, 2003).
54. Plummer, M., Best, N., Cowles, K. & Vines, K. Coda: Convergence diagnosis and output analysis for mcmc. *R News* **6**, 7–11 (2006).
55. Pagel, M. Inferring the historical patterns of biological evolution. *Nat.* **401**, 877–884 (1999).
56. Revell, L. J. phytools: an r package for phylogenetic comparative biology (and other things). *Methods Ecol. Evol.* **3**, 217–223 (2012).

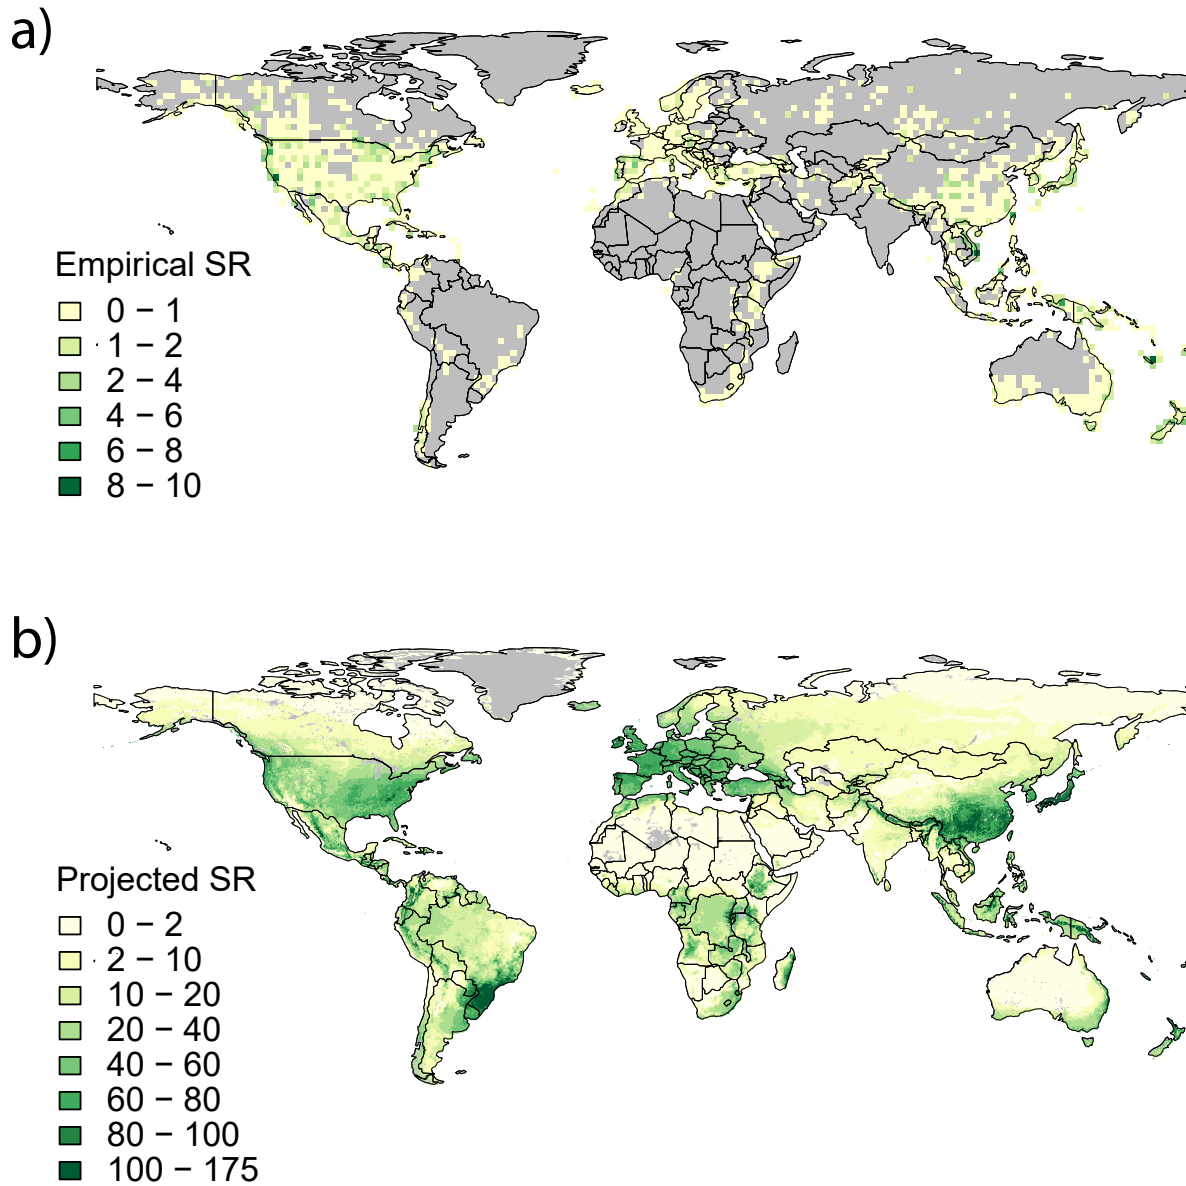

**Figure 1.** Global species richness (SR) for 455 conifer species based on: a) the cleaned empirical distribution data; and b) projections from process based species distribution models.

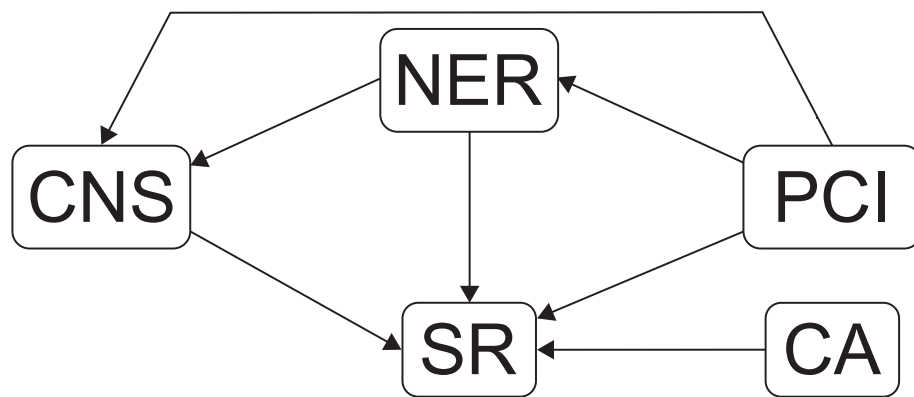

**Figure 2.** *A-priori* conceptual model of direct and indirect effects of niche and phylogenetic parameters on clade species richness (SR). Bounded diversification predicts a negative effect of PCI, and unbounded diversification a positive effect of NER in combination with variation in CNS, indicating niche partitioning and/or expansion. SR = species richness; CA = clade age; PCI = phylogenetic competition index; NER = multivariate niche evolution rate; CNS = clade niche size.

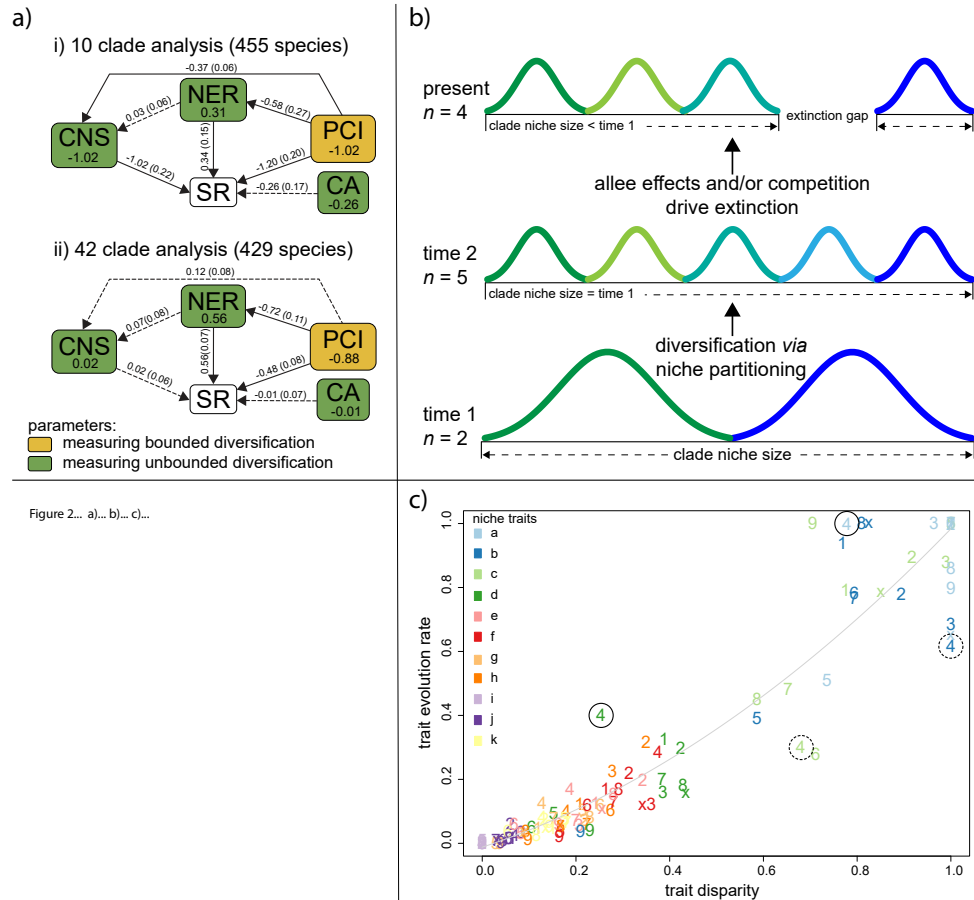

Figure 2... a)... b)... c)...

**Figure 3.** a) Bayesian path analysis showing the relative effects of niche and phylogenetic parameters on clad species richness for 455 conifer species in i) 10 large clades, and ii) 42 smaller clades. Total effect size is shown with the parameters, while direct effects and their standard deviation are shown along the vertices. Solid lines are significantly different from zero (95% credible intervals not including zero). SR = species richness; CA = clade age; PCI = phylogenetic competition index; NER = multivariate niche evolution rate; CNS = clade niche size. b) example of how niche partitioning combined with extinction associated with allee effects and/or competition, can result in a negative relationship between clade niche size and species richness. Different coloured curves represent species. c) within clade variation in the flexibility of niche traits. Coloured numbers refer to clades 1-10 (with  $\times=10$ ), and different colours refer to different niche dimensions. The order and definition of niche dimensions (a-k) are as Fig 3. The best fit line (grey) is to allow visualisation of residual deviance (see text). Niche traits in solid and dashed circles are discussed in the text.

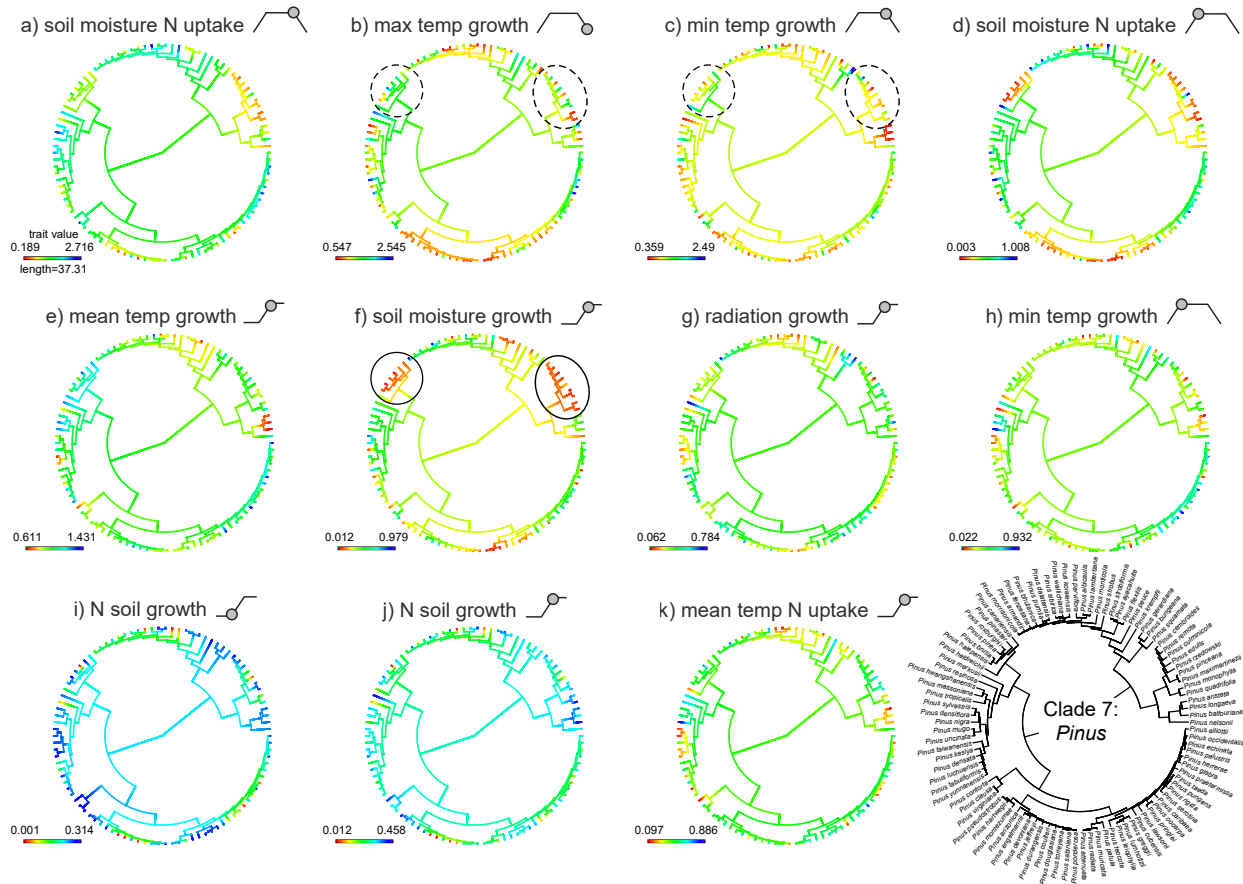

**Figure 4.** Phylogenies of Clade 7 (*Pinus*) showing ancestral state reconstructions of the 11 most important niche dimensions in order of importance (a-k). The bottom right panel shows the same phylogeny with species names. Sub clades within *Pinus* with conservative (solid ellipse) and labile (dashed ellipse) niche dimensions are highlighted and discussed in the text. The filled circle on trapezoid and logistic diagrams beside the trait names, show how the trait relates to the modelled growth or resource acquisition function. For example, (a) is the point at which soil moisture causes a reduction in N uptake, that is, when waterlogging reduces N uptake.
